# Supplementary material
Source: PubMed Central journal article supplement (PMC4650575)
Supplement: cr20156x2.pdf [file cr20156x2.pdf]

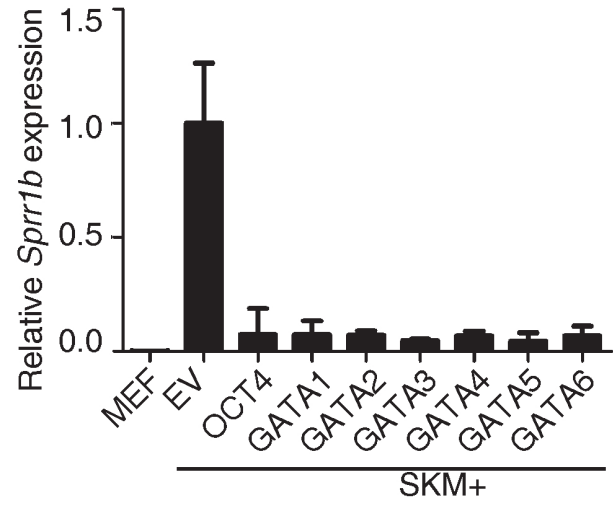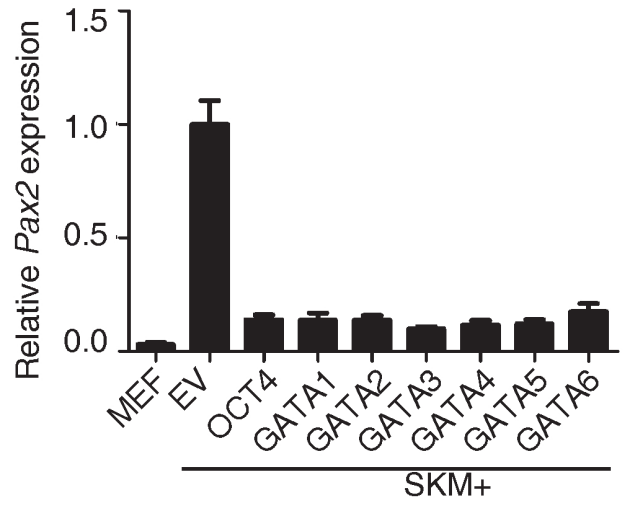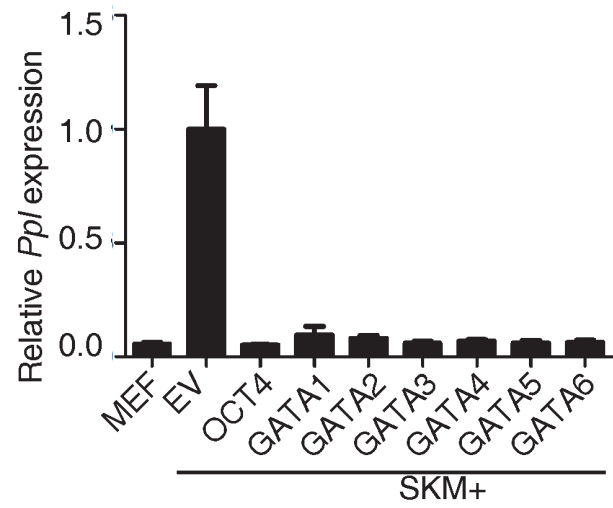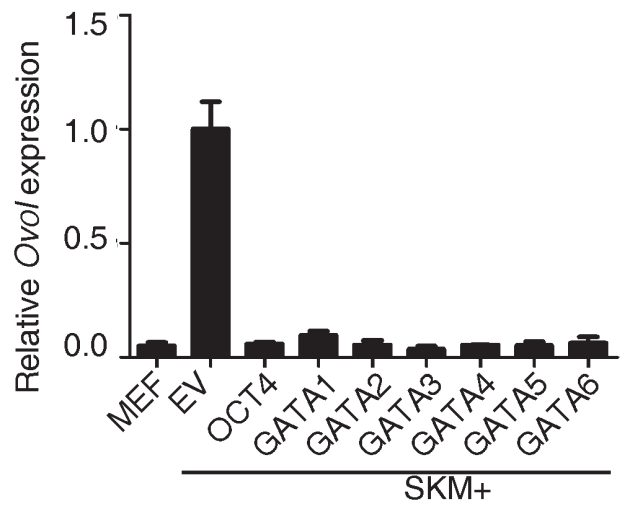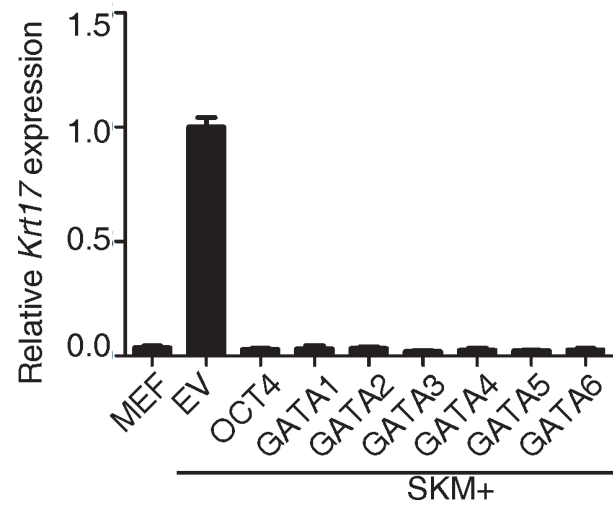

**Supplementary Information, Figure S2** Quantitative RT-PCR analysis of the expression of endogenous ECT related genes relative to the expression of SKM.
