# Supplementary material
Source: PubMed Central journal article supplement (PMC4650575)
Supplement: cr20156x3.pdf [file cr20156x3.pdf]

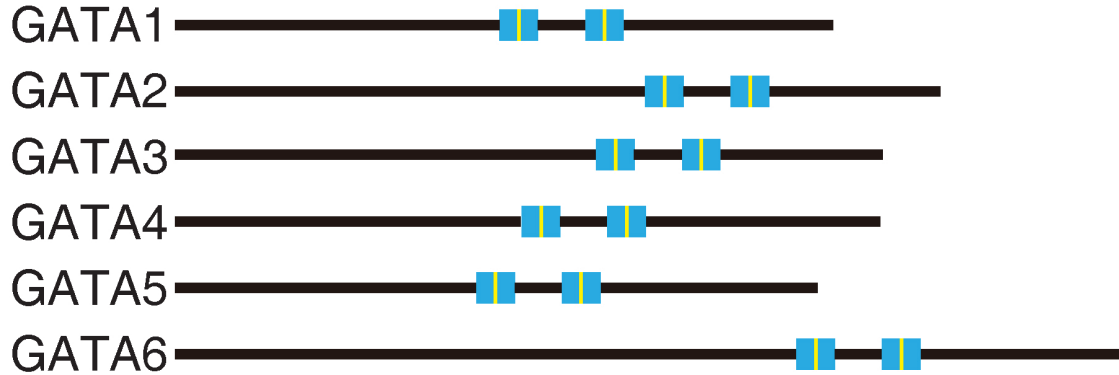

**Supplementary information, Figure S3** A schematic diagram to illustrate zinc-finger domains in GATA family members.
