# Supplementary material
Source: PubMed Central journal article supplement (PMC4650575)
Supplement: cr20156x4.pdf [file cr20156x4.pdf]

**A**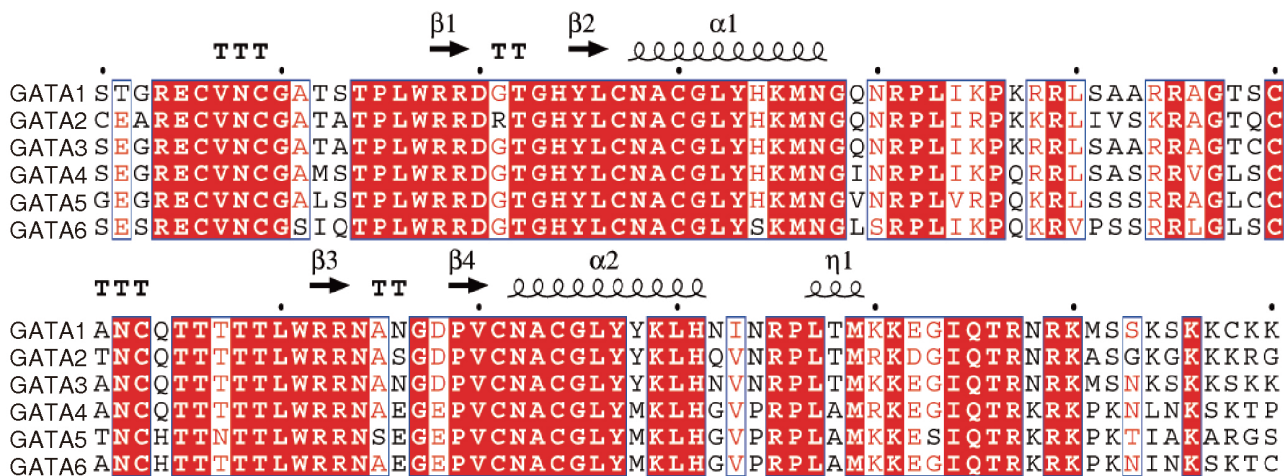**B**

|             |                                                                                              |
|-------------|----------------------------------------------------------------------------------------------|
| GATA1-WT    | PLPPCEAREC VNCGATATPLWRRDRDTGHYLCNACGLYHKMNGQNRPLIRPKRRLIVSKRAGTQCTNCQTTTTLWRRNASGDPVCNACGLY |
| GATA1-N-Mut | PLPPCEAREC VNCGATATPLWARDRTGHYLCNACGLYHKMNGQNRPLIRPKRRLIVSKRAGTQCTNCQTTTTLWRRNASGDPVCNACGLY  |
| GATA1-C-Mut | PLPPCEAREC VNCGATATPLWRRDRDTGHYLCNACGLYHKMNGQNRPLIRPKRRLIVSKRAGTQCTNCQTTTTLWRRNASGDPVCNACGLY |
| GATA1-D-Mut | PLPPCEAREC VNCGATATPLWARDRTGHYLCNACGLYHKMNGQNRPLIRPKRRLIVSKRAGTQCTNCQTTTTLWRRNASGDPVCNACGLY  |
| GATA2-WT    | SEGREC VNCGATATPLWRRDGTGHYLCNACGLYHKMNGQNRPLIKPKRRLSAARRAGTCCANCQTTTTLWRRNANGDPVCNACGLYKHL   |
| GATA2-N-Mut | SEGREC VNCGATATPLWARDGTGHYLCNACGLYHKMNGQNRPLIKPKRRLSAARRAGTCCANCQTTTTLWRRNANGDPVCNACGLYKHL   |
| GATA2-C-Mut | SEGREC VNCGATATPLWRRDGTGHYLCNACGLYHKMNGQNRPLIKPKRRLSAARRAGTCCANCQTTTTLWRRNANGDPVCNACGLYKHL   |
| GATA2-D-Mut | SEGREC VNCGATATPLWARDGTGHYLCNACGLYHKMNGQNRPLIKPKRRLSAARRAGTCCANCQTTTTLWRRNANGDPVCNACGLYKHL   |
| GATA3-WT    | 3REC VNCGATSTPLWRRDGTGHYLCNACGLYHKMNGQNRPLIKPKRRLSAARRAGTSCANCQTTTTLWRRNANGDPVCNACGLYKHLN    |
| GATA3-N-Mut | GREC VNCGATSTPLWARDGTGHYLCNACGLYHKMNGQNRPLIKPKRRLSAARRAGTSCANCQTTTTLWRRNANGDPVCNACGLYKHLN    |
| GATA3-C-Mut | GREC VNCGATSTPLWRRDGTGHYLCNACGLYHKMNGQNRPLIKPKRRLSAARRAGTSCANCQTTTTLWRRNANGDPVCNACGLYKHLN    |
| GATA3-D-Mut | GREC VNCGATSTPLWARDGTGHYLCNACGLYHKMNGQNRPLIKPKRRLSAARRAGTSCANCQTTTTLWRRNANGDPVCNACGLYKHLN    |
| GATA4-WT    | FSEGREC VNCGAMSTPLWRRDGTGHYLCNACGLYHKMNGINRPLIKPQRRLSASRRVGLSCANCQTTTTLWRRNAEGEPVCNACGLYMK   |
| GATA4-N-Mut | FSEGREC VNCGAMSTPLWARDGTGHYLCNACGLYHKMNGINRPLIKPQRRLSASRRVGLSCANCQTTTTLWRRNAEGEPVCNACGLYMK   |
| GATA4-C-Mut | FSEGREC VNCGAMSTPLWRRDGTGHYLCNACGLYHKMNGINRPLIKPQRRLSASRRVGLSCANCQTTTTLWRRNAEGEPVCNACGLYMK   |
| GATA4-D-Mut | FSEGREC VNCGAMSTPLWARDGTGHYLCNACGLYHKMNGINRPLIKPQRRLSASRRVGLSCANCQTTTTLWRRNAEGEPVCNACGLYMK   |
| GATA5-WT    | EGREC VNCGALSTPLWRRDGTGHYLCNACGLYHKMNGVNRPLVRPQKRLSSRRAGLCCCTNCHTTNTTLWRRNSEGEPVCNACGLYMKL   |
| GATA5-N-Mut | EGREC VNCGALSTPLWARDGTGHYLCNACGLYHKMNGVNRPLVRPQKRLSSRRAGLCCCTNCHTTNTTLWRRNSEGEPVCNACGLYMKL   |
| GATA5-C-Mut | EGREC VNCGALSTPLWRRDGTGHYLCNACGLYHKMNGVNRPLVRPQKRLSSRRAGLCCCTNCHTTNTTLWRRNSEGEPVCNACGLYMKL   |
| GATA5-D-Mut | EGREC VNCGALSTPLWARDGTGHYLCNACGLYHKMNGVNRPLVRPQKRLSSRRAGLCCCTNCHTTNTTLWRRNSEGEPVCNACGLYMKL   |
| GATA6-WT    | REC VNCGSIQTPLWRRDGTGHYLCNACGLYSKMNGLSRPLIKPQKRVPSRRRLGLSCANCHTTNTTLWRRNAEGEPVCNACGLYMKLHGV  |
| GATA6-N-Mut | REC VNCGSIQTPLWARDGTGHYLCNACGLYSKMNGLSRPLIKPQKRVPSRRRLGLSCANCHTTNTTLWRRNAEGEPVCNACGLYMKLHGV  |
| GATA6-C-Mut | REC VNCGSIQTPLWRRDGTGHYLCNACGLYSKMNGLSRPLIKPQKRVPSRRRLGLSCANCHTTNTTLWRRNAEGEPVCNACGLYMKLHGV  |
| GATA6-D-Mut | REC VNCGSIQTPLWARDGTGHYLCNACGLYSKMNGLSRPLIKPQKRVPSRRRLGLSCANCHTTNTTLWRRNAEGEPVCNACGLYMKLHGV  |

**Supplementary Information, Figure S4 Strategies for mutation of GATA family members.** (A) A schematic diagram illustrating two conserved zinc-finger domains of GATA family (red). The secondary structure of GATA3 is depicted in this figure. (B) Mutation strategy of GATA family members. A diagram depicting detailed protein sequences of the conserved zinc-finger domains of GATA family members. Mutated sites are highlighted in green.
