# Supplementary material
Source: PubMed Central journal article supplement (PMC4650575)
Supplement: cr20156x5.pdf [file cr20156x5.pdf]

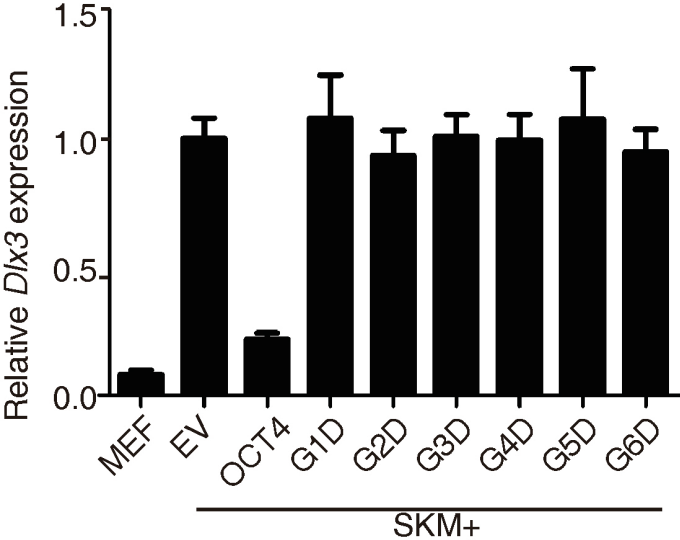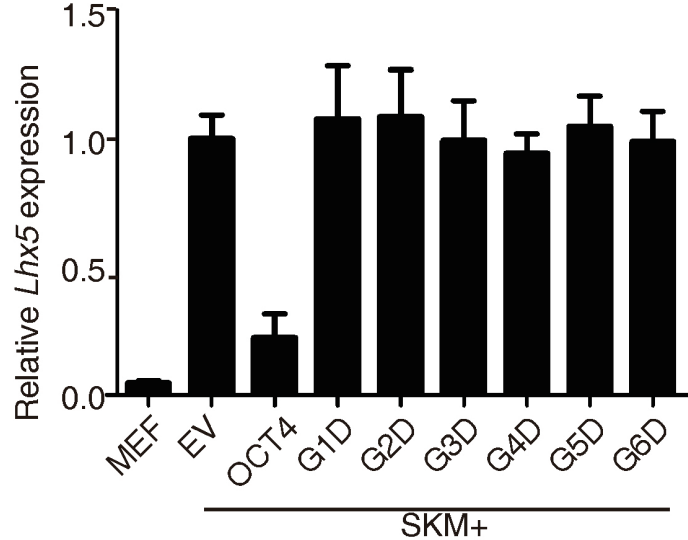

**Supplementary Information, Figure S5** Quantitative RT-PCR analysis of the expression of endogenous *Dlx3* and *Lhx5* genes relative to the expression in SKM, G1D, G2D, G3D, G4D, G5D, and G6D represent corresponding GATA-Double mutations.
