# Supplementary material
Source: PubMed Central journal article supplement (PMC4650575)
Supplement: cr20156x6.pdf [file cr20156x6.pdf]

**A**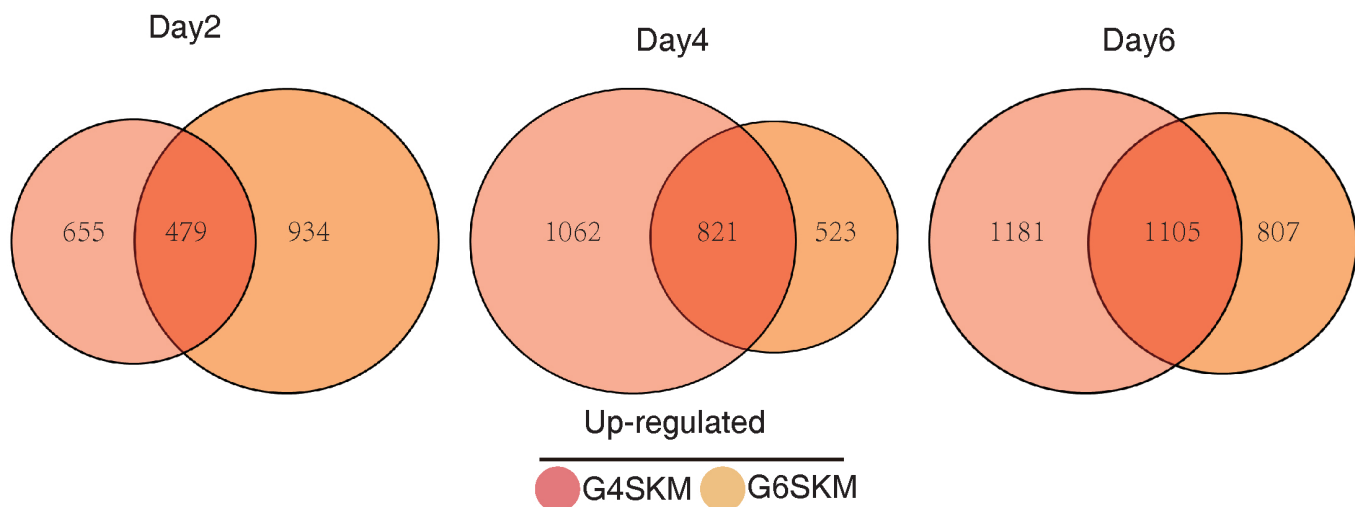**B**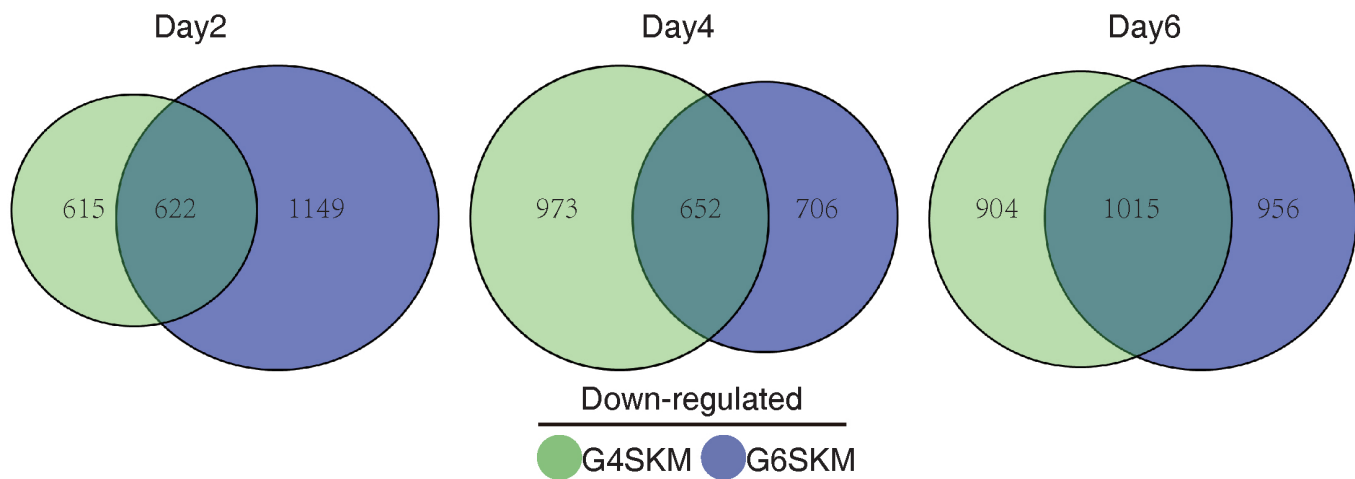

**Supplementary information, Figure S6** Venn diagram illustrating the overlap genes during secondary MEFs reprogramming. (A-B) up-regulated genes (A) and down-regulated genes (B) at indicated days post induction compared to Day 0 in GATA4- and GATA6- induced secondary MEFs reprogramming.
