# Supplementary material
Source: PubMed Central journal article supplement (PMC4650575)
Supplement: cr20156x7.pdf [file cr20156x7.pdf]

**A**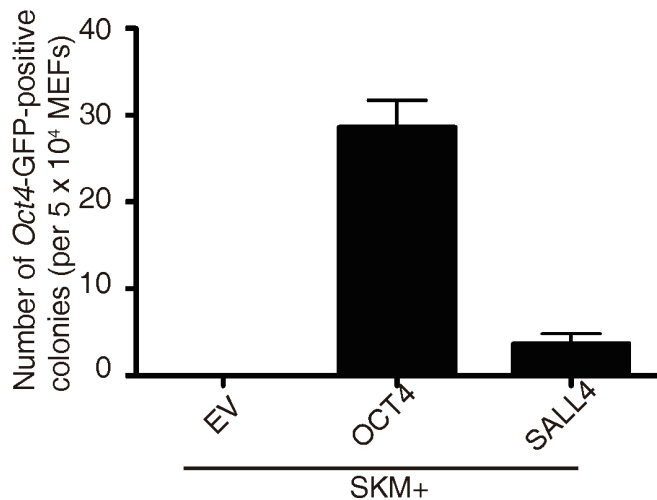**B**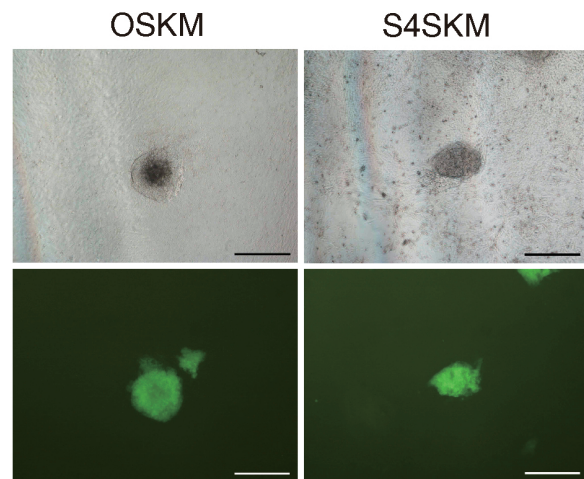

**Supplementary Information, Figure S7** *Sall4* substitutes for *Oct4* in MEF reprogramming to pluripotency. (A) Verification of the ability of *SALL4* to substitute for *OCT4* in reprogramming of MEFs to pluripotency. EV plus SKM was used as a negative control. (B) The generation of iPS colonies with OSKM (left), *Sall4*+SKM (right) from *Oct4*-GFP MEFs. Phase (upper panel) and GFP images (lower panel) of primary of iPS colonies. Scale bars, 500  $\mu$ m.
