# Supplementary material
Source: PubMed Central journal article supplement (PMC4650575)
Supplement: cr20156x8.pdf [file cr20156x8.pdf]

**A**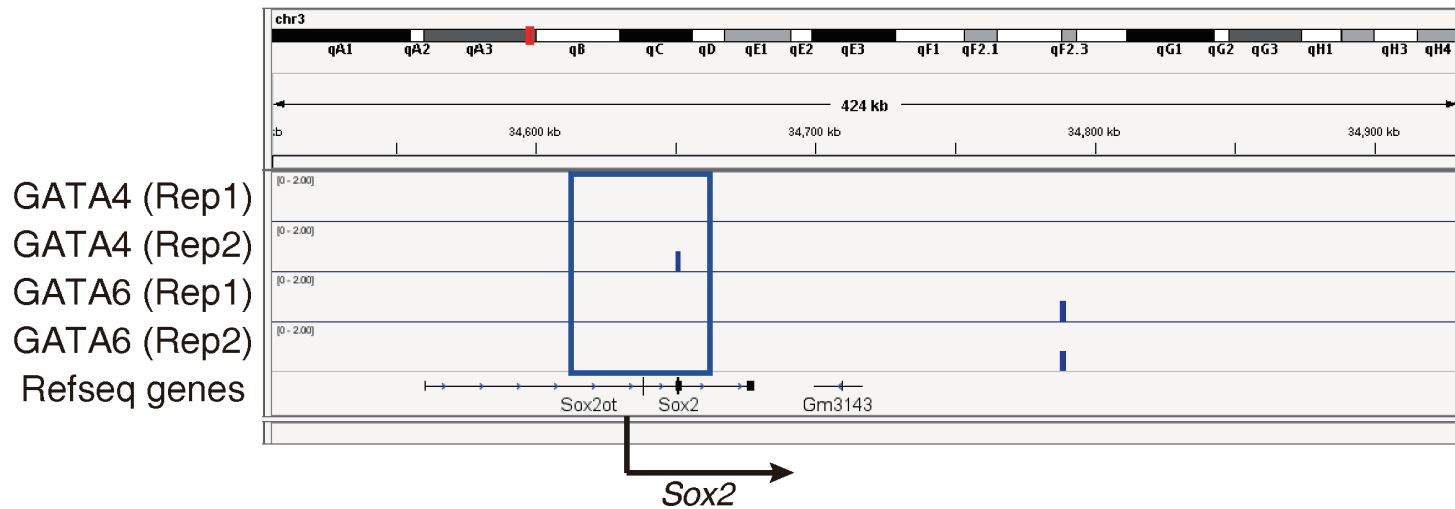**B**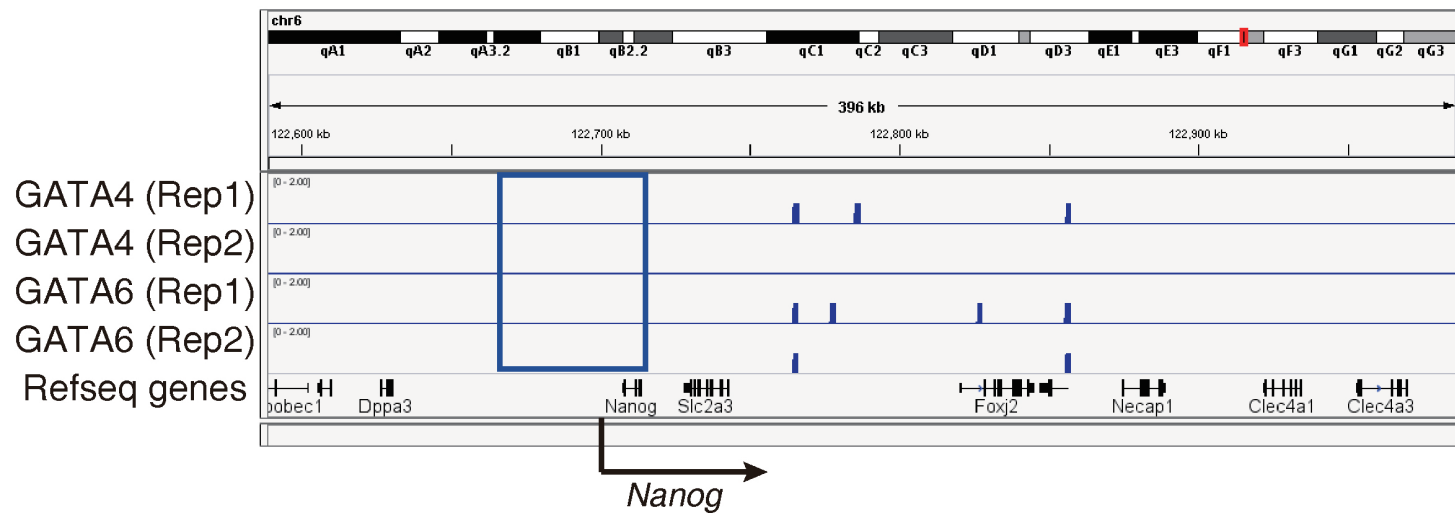

**Supplementary Information, Figure S8** ChIP-seq binding profiles for *Sox2* and *Nanog* loci using secondary MEFs. (A-B) GATA4 and GATA6 binding profiles at *Sox2* (A) and *Nanog* (B) loci (blue box), arrows indicating the transcription direction.
