# Supplementary material
Source: PubMed Central journal article supplement (PMC4650575)
Supplement: cr20156x9.pdf [file cr20156x9.pdf]

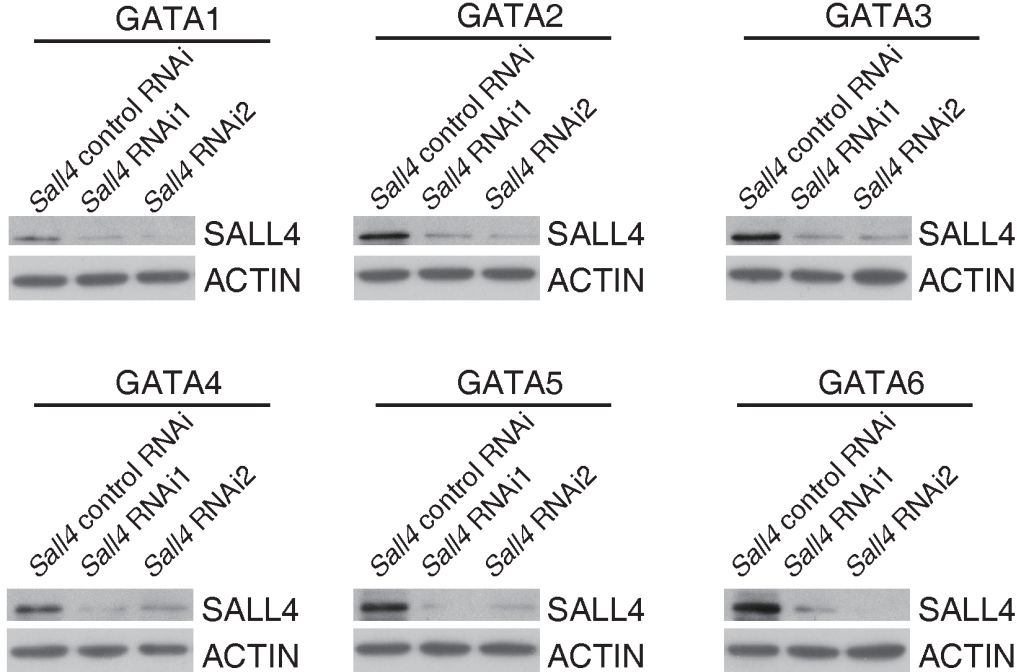

**Supplementary Information, Figure S9** Western blot analysis of SALL4 knockdown in different GATA family member-mediated secondary MEF reprogramming. *Sall4* control RNAi was used as a negative control, ACTIN was used as loading control.
