# Supplementary material
Source: PubMed Central journal article supplement (PMC4650575)
Supplement: cr20156x10.pdf [file cr20156x10.pdf]

**Table S1. Number of reads (total reads, mapped reads, unique reads) in RNA-seq (GATA4)**

| Sample          | Total reads | High quality reads | Total mapped | Percentage | Unique mapped | Percentage |
|-----------------|-------------|--------------------|--------------|------------|---------------|------------|
| GATA4-Day0-Rep1 | 25,500,573  | 25,450,386         | 23,854,430   | 93.5%      | 19,889,704    | 78.0%      |
| GATA4-Day0-Rep2 | 26,554,595  | 26,495,068         | 24,933,869   | 93.9%      | 21,056,957    | 79.3%      |
| GATA4-Day2-Rep1 | 26,819,723  | 26,767,245         | 25,420,129   | 94.8%      | 21,324,257    | 79.5%      |
| GATA4-Day2-Rep2 | 25,970,156  | 25,895,700         | 24,451,028   | 94.2%      | 20,514,727    | 79.0%      |
| GATA4-Day4-Rep1 | 23,053,997  | 23,015,078         | 21,613,845   | 93.8%      | 18,095,361    | 78.5%      |
| GATA4-Day4-Rep2 | 22,218,573  | 22,189,392         | 20,219,789   | 91.0%      | 16,739,133    | 75.3%      |
| GATA4-Day6-Rep1 | 22,025,003  | 21,276,165         | 19,794,347   | 89.9%      | 16,560,065    | 75.2%      |
| GATA4-Day6-Rep2 | 23,349,395  | 22,846,388         | 20,888,686   | 89.5%      | 17,555,522    | 75.2%      |
