# Supplementary material
Source: PubMed Central journal article supplement (PMC4650575)
Supplement: cr20156x11.pdf [file cr20156x11.pdf]

**Table S2. Distribution of all expressed genes in different expression levels (GATA4)**

| Expression level (FPKM) | Day0   | Day2   | Day4   | Day6   |
|-------------------------|--------|--------|--------|--------|
| Low 0.1-1               | 4,142  | 4,181  | 4,053  | 4,187  |
| Medium 1-100            | 11,681 | 11,875 | 12,004 | 12,273 |
| High >100               | 1,173  | 1,052  | 1,124  | 1,091  |
| Total                   | 17,176 | 17,108 | 17,181 | 17,551 |
