# Supplementary material
Source: PubMed Central journal article supplement (PMC4650575)
Supplement: cr20156x12.pdf [file cr20156x12.pdf]

**Table S3. Number of reads (total reads, mapped reads, unique reads) in RNA-seq (GATA6)**

| Sample          | Total reads | High quality reads | Total mapped | Percentage | Unique mapped | Percentage |
|-----------------|-------------|--------------------|--------------|------------|---------------|------------|
| GATA6-Day0-Rep1 | 30,086,561  | 30,001,382         | 28,411,829   | 94.4%      | 24,009,935    | 79.8%      |
| GATA6-Day0-Rep2 | 25,490,442  | 25,402,794         | 24,020,675   | 94.2%      | 20,138,374    | 79.0%      |
| GATA6-Day2-Rep1 | 24,276,161  | 24,254,148         | 22,830,698   | 94.0%      | 18,577,517    | 76.5%      |
| GATA6-Day2-Rep2 | 21,751,582  | 21,703,823         | 20,463,893   | 94.1%      | 16,771,812    | 77.1%      |
| GATA6-Day4-Rep1 | 26,859,216  | 26,411,076         | 24,426,589   | 90.9%      | 20,407,868    | 76.0%      |
| GATA6-Day4-Rep2 | 23,700,347  | 23,430,309         | 21,905,828   | 92.4%      | 18,274,571    | 77.1%      |
| GATA6-Day6-Rep1 | 26,145,320  | 25,595,400         | 23,643,070   | 90.4%      | 19,636,629    | 75.1%      |
| GATA6-Day6-Rep2 | 30,043,417  | 29,194,441         | 26,773,221   | 89.1%      | 22,164,643    | 73.8%      |
