# Supplementary material
Source: PubMed Central journal article supplement (PMC4650575)
Supplement: cr20156x13.pdf [file cr20156x13.pdf]

**Table S4. Distribution of all expressed genes in different expression levels (GATA6)**

| Expression level (FPKM) | Day0   | Day2   | Day4   | Day6   |
|-------------------------|--------|--------|--------|--------|
| Low 0.1-1               | 4,114  | 4,814  | 4,231  | 4,278  |
| Medium 1-100            | 11,874 | 12,065 | 12,203 | 12,217 |
| High >100               | 1,166  | 1,053  | 1,062  | 1,065  |
| Total                   | 17,154 | 17,932 | 17,496 | 17,560 |
