# Supplementary material
Source: PubMed Central journal article supplement (PMC4650575)
Supplement: cr20156x14.pdf [file cr20156x14.pdf]

**Table S5. Number of reads (total reads, mapped reads, unique reads) in ChIP-seq**

| Sample           | Total reads | High quality reads | Total mapped | Percentage | Unique mapped | Percentage |
|------------------|-------------|--------------------|--------------|------------|---------------|------------|
| GATA4-Day6-Rep1  | 28,499,634  | 27,939,267         | 26,201,091   | 91.9%      | 19,351,893    | 67.9%      |
| GATA4-Day6-Rep2  | 47,438,044  | 47,381,257         | 42,514,386   | 89.6%      | 29,502,296    | 62.2%      |
| GATA4-Day6-Input | 41,732,808  | 41,530,132         | 40,837,336   | 97.8%      | 30,176,355    | 72.3%      |
| GATA6-Day6-Rep2  | 33,079,664  | 32,606,265         | 29,990,603   | 90.7%      | 21,766,548    | 65.8%      |
| GATA6-Day6-Rep1  | 33,377,431  | 33,346,539         | 30,250,402   | 90.6%      | 22,197,900    | 66.5%      |
| GATA6-Day6-Input | 49,729,886  | 49,602,344         | 48,739,956   | 98.0%      | 35,064,858    | 70.5%      |
